# Supplementary material for: Antecedents of IS Strategic Alignment: A Nomological Network
Source: Atypon-hosted journal article supplement (doi:10.1287/isre.1070.0159), 2008-06-06
Supplement: isre.1070.0159-sm-online_supplement.pdf [file isre.1070.0159-sm-online_supplement.pdf]

## Antecedents of IS Strategic Alignment: A Nomological Network Online Supplement

**Table 1: Shared Understanding/Shared Knowledge Definitions from Prior Literature<sup>1</sup>**

| Study                           | Methodology           | Concept                          | Definition                                                                                                                                                                                                                                                                                                                                                                              |
|---------------------------------|-----------------------|----------------------------------|-----------------------------------------------------------------------------------------------------------------------------------------------------------------------------------------------------------------------------------------------------------------------------------------------------------------------------------------------------------------------------------------|
| Lind and Zmud 1991              | Survey                | Shared Understanding             | <u>Convergence</u> : The degree of mutual understanding between technology providers and other business personnel about the firm's business activities and the importance of the technology importance of technology in supporting those activities                                                                                                                                     |
| Boynton, Zmud, et al. 1994      | Survey                | Shared Knowledge/ Understanding  | <u>Managerial IT Knowledge</u> : An intertwined and dynamic pool of knowledge represented by the conjunction of IT-related and business-related knowledge possessed by and exchanged among IT managers and business unit or line managers.                                                                                                                                              |
| Nelson and Coopridge 1996       | Survey                | Shared Knowledge / Understanding | <u>Shared Knowledge</u> : The level of understanding and appreciation among IS and line managers for the technologies and processes that affect their mutual performance.                                                                                                                                                                                                               |
| Reich and Benbasat 1996         | Multiple Case Studies | Shared Understanding             | <u>Social Dimension of Alignment</u> : The level of mutual understanding of and commitment to the business and IT mission, objectives, and plans by IS and business executives. Specifically, IS executives understand and are committed to the business mission, objectives, and plans; and business executives understand and are committed to the IT mission, objectives, and plans. |
| Armstrong and Sambamurthy 1999  | Survey                | Shared Knowledge                 | <u>Senior Leadership Knowledge</u> : The strategic IT-related knowledge and business knowledge held by the organization's senior IS and business executives.                                                                                                                                                                                                                            |
| Reich and Benbasat 2000         | Multiple Case Studies | Shared Knowledge                 | <u>Shared Domain Knowledge</u> : The ability of IT and business executives, at a deep level, to understand and be able to participate in the other's key processes and to respect each other's unique contribution and challenges.                                                                                                                                                      |
| Reich and Benbasat 2000         | Multiple Case Studies | Shared Understanding             | <u>Short-Term Social Dimension of Alignment</u> : The state in which business and IT executives understand and are committed to each other's short term plans and objectives                                                                                                                                                                                                            |
| Reich and Benbasat 2000         | Multiple Case Studies | Shared Vision                    | <u>Long-Term Social Dimension of Alignment</u> : The state in which business and IT executives share a common vision of the ways in which IT will contribute to the success of the business unit.                                                                                                                                                                                       |
| Johnson and Lederer 2005        | Survey                | Mutual Understanding             | <u>CEO/CIO Convergence on the Role of IT</u> : The degree of mutual understanding between an organization's CEO and CIO about the role of IT.                                                                                                                                                                                                                                           |
| Chan, Sabherwal, et al. 2006    | Survey                | Shared Knowledge                 | <u>Shared Domain Knowledge</u> : How informed IS managers are on the organization's long-term plans and how informed top management is on information technology.                                                                                                                                                                                                                       |
| Preston, Karahanna. et al. 2006 | Survey                | Shared Understanding             | <u>Shared Understanding</u> : Shared understanding between the CIO and TMT regarding the role of IT within the organization                                                                                                                                                                                                                                                             |
| Tan and Gallupe (2006)          | Cognitive Mapping     | Shared Understanding             | <u>Shared Understanding</u> : A shared cognition between IS executives and business executives                                                                                                                                                                                                                                                                                          |

<sup>1</sup> In terms of the shared understanding studies in the table, IS strategic alignment was the dependent variable only in Preston et al (2006) and Tan and Gallupe (2006). Reich and Benbasat (1996, 2000) developed shared understanding/shared vision (as the dependent variable) to measure the social dimension of IS strategic alignment.

**Table 2: Characteristics of the CIO/TMT Respondents and Organizations**

| CIO / TMT Characteristics                   | CIO Mean or %                                                                       | TMT - Mean or %                                                                           |
|---------------------------------------------|-------------------------------------------------------------------------------------|-------------------------------------------------------------------------------------------|
| Age                                         | 48.66                                                                               | 51.12                                                                                     |
| Organizational Tenure                       | 7.48                                                                                | 11.03                                                                                     |
| Gender                                      | 80.6% male                                                                          | 78.7% male                                                                                |
| Top Management Team Member                  | 63.3%                                                                               | 100%                                                                                      |
| <u>Reporting Level to CEO</u>               |                                                                                     | All TMT respondents are either the CEO or directly report to the CEO                      |
| 0 (Direct Report)                           | 107 (45.2%)                                                                         |                                                                                           |
| 1                                           | 128 (54.0%)                                                                         |                                                                                           |
| 2 or more                                   | 2 (0.8%)                                                                            |                                                                                           |
| <b>CIO / TMT Characteristics</b>            | <b>CIO - N (%)</b>                                                                  | <b>TMT - N (%)</b>                                                                        |
| CIO/TMT Title                               | CIO: 158 (65.0%)<br>IS Director/Mgr: 64 (26.4%)<br>VP: 15 (6.2%)<br>Other: 6 (2.4%) | CEO: 91 (30.0%)<br>CFO: 67 (22.2%)<br>COO: 44 (14.5%)<br>VP: 86 (28.3%)<br>Other: 15 (5%) |
| <u>Educational Background</u>               |                                                                                     |                                                                                           |
| PhD / MD / JD                               | 11(4.6%) / 0(0.0%) / 0(0.0%)                                                        | 14(4.7%) / 24(8.0%) / 12(4.0%)                                                            |
| Masters Degree                              | 103 (43.1%)                                                                         | 169 (56.1%)                                                                               |
| Bachelors Degree                            | 106 (44.3%)                                                                         | 77 (25.6%)                                                                                |
| Associates Degree                           | 10 (4.2%)                                                                           | 1 (0.3%)                                                                                  |
| High School Degree                          | 9 (3.8%)                                                                            | 4 (1.3%)                                                                                  |
| <b>Firm Characteristics</b>                 | <b>N</b>                                                                            | <b>Mean or %</b>                                                                          |
| Annual Sales (million \$)                   | 219                                                                                 | \$234                                                                                     |
| Number of Employees                         | 217                                                                                 | 1,700                                                                                     |
| Healthcare / Non-Healthcare                 | 152 / 91                                                                            | 62.6% / 37.4%                                                                             |
| Private / Public                            | 214 / 14                                                                            | 93.9% / 6.1%                                                                              |
| U.S. Based / Non-U.S. (3 Canada; 1 Iceland) | 239 / 4                                                                             | 98.4% / 1.6%                                                                              |

Note: N = 243 for CIO respondents; N = 303 for TMT members (including duplicate respondents from each firm)

**Table 3: Summary Statistics**

| Variable                                                                               | N   | Mean  | Std Dev | Min.  | Max.    |
|----------------------------------------------------------------------------------------|-----|-------|---------|-------|---------|
| <b>IS Strategic Alignment<sup>1</sup></b> (3 questions – average of CIO/TMT responses) | 243 | 4.13  | 0.61    | 1.33  | 5.00    |
| <b>Shared Understanding<sup>1</sup></b> (4 questions – average of CIO/TMT responses)   | 243 | 4.01  | 0.55    | 2.13  | 5.00    |
| <b>Shared Language<sup>1</sup></b> (3 questions – average of CIO/TMT responses)        | 243 | 3.91  | 0.51    | 2.35  | 5.00    |
| <b>Shared Domain Knowledge</b>                                                         |     |       |         |       |         |
| CIO's Business Knowledge <sup>2</sup> (3 questions)                                    | 243 | 3.85  | 0.82    | 1.33  | 5.00    |
| TMT's Strategic IS Knowledge <sup>2</sup> (3 questions)                                | 241 | 2.93  | 0.88    | 1.33  | 5.00    |
| <b>Systems of Knowing</b>                                                              |     |       |         |       |         |
| Structural SK – Extent of TMT Participation <sup>4</sup> (1 question)                  | 240 | 4.48  | 0.79    | 1.00  | 5.00    |
| Structural SK – Reporting Level <sup>5</sup> (1 question)                              | 237 | 2.44  | 0.51    | 1.00  | 3.00    |
| Structural SK – Formal Interaction <sup>3</sup> (1 question)                           | 242 | 5.60  | 1.07    | 2.00  | 7.00    |
| Social SK <sup>3</sup> (3 questions)                                                   | 243 | 5.29  | 0.86    | 2.30  | 7.00    |
| <b>CIO Educational Mechanisms</b>                                                      |     |       |         |       |         |
| CIO's Management of TMT Expectations <sup>1</sup> (5 Questions)                        | 243 | 4.33  | 0.45    | 2.60  | 5.00    |
| CIO's Organization of Educational Events <sup>3</sup> (4 questions)                    | 241 | 2.07  | 0.91    | 1.00  | 6.00    |
| <b>Experiential Characteristics</b>                                                    |     |       |         |       |         |
| Common CIO/TMT Interests <sup>1</sup> (1 question)                                     | 242 | 2.60  | 0.80    | 1.00  | 5.00    |
| CIO Business Experience <sup>6</sup>                                                   | 242 | 8.36  | 7.51    | 0.00  | 38.00   |
| TMT IS Experience <sup>6</sup>                                                         | 240 | 1.33  | 4.14    | 0.00  | 33.00   |
| <b>Demographic Characteristics</b>                                                     |     |       |         |       |         |
| CIO Age <sup>6</sup>                                                                   | 239 | 48.66 | 7.60    | 28.00 | 65.00   |
| TMT Member Age <sup>6</sup>                                                            | 241 | 51.12 | 7.01    | 33.00 | 69.00   |
| <b>Industry Characteristics</b>                                                        |     |       |         |       |         |
| Annual Sales (million \$)                                                              | 219 | \$234 | \$674   | \$.04 | \$6,600 |
| Number of Employees                                                                    | 217 | 1,700 | 2,665   | 3     | 18,500  |

<sup>1</sup> 5-point scale ranging from "strongly agree"(5) to "strongly disagree"(1); <sup>2</sup> 5-point scale ranging from "extremely well informed" (5) to "not well informed" (1).;

<sup>3</sup> 7-point scale ranging from "daily" (7) to "never" (1); <sup>4</sup> 5-point scale ranging from "team member"(5) to "never involved"(1); <sup>5</sup> direct report to CEO (3) to two or more levels (1); <sup>6</sup> measured in years.
